# Supplementary material for: Characterisation of particle single-scattering albedo with a modified airborne dual-wavelength CAPS monitor
Source: Copernicus journal article supplement (doi:10.5194/amt-17-3419-2024), 2024-06-04
Supplement: Supplementary file 1 [file amt-17-3419-2024-supplement.pdf]

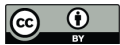

*Supplement of*

## **Characterisation of particle single-scattering albedo with a modified airborne dual-wavelength CAPS monitor**

**Chenjie Yu et al.**

*Correspondence to:* Chenjie Yu ([chenjie.yu@lisa.ipsl.fr](mailto:chenjie.yu@lisa.ipsl.fr)) and Paola Formenti ([paola.formenti@lisa.ipsl.fr](mailto:paola.formenti@lisa.ipsl.fr))

The copyright of individual parts of the supplement might differ from the article licence.

## S1 Chamber characterisation experiment

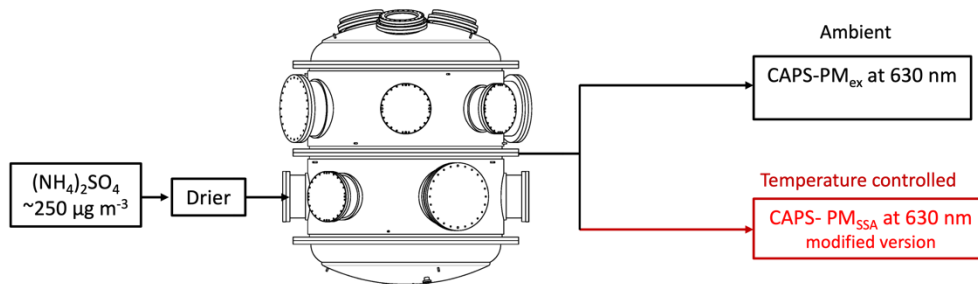

Figure S1 Instrument configurations for the intercomparison study at different pressure levels with controlled temperatures within the CESAM chamber

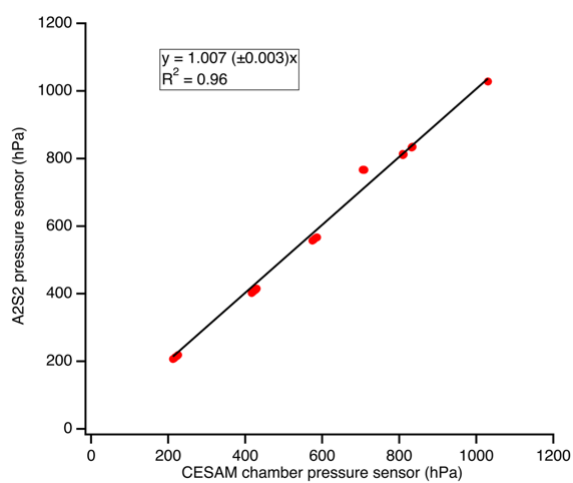

Figure S2 Intercomparison between the CESAM chamber pressure sensor and the A2S2 pressure sensor

## S2 Airborne deployment of the A2S2

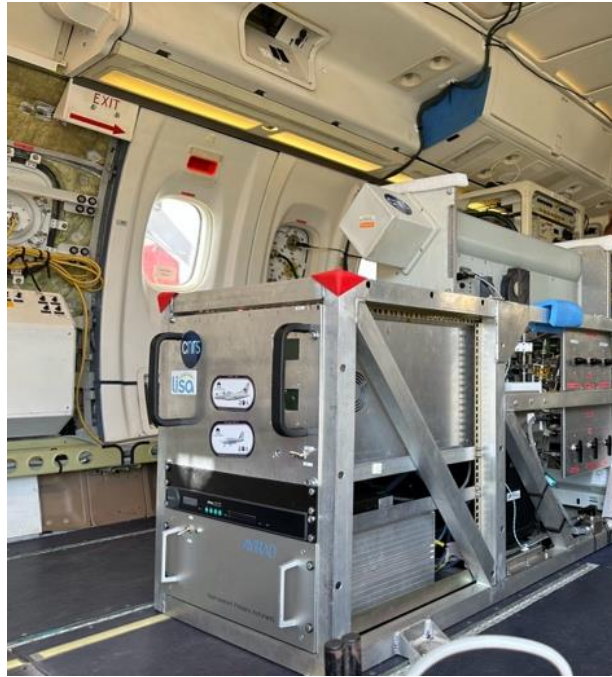

Figure S3 Photo of the A2S2 configured as part of the AVIRAD system onboard the ATR-42

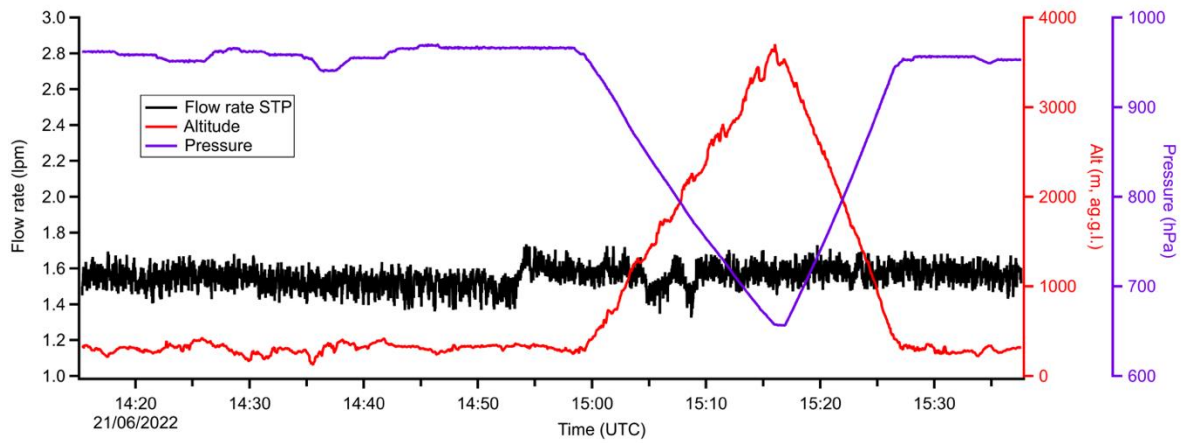

Figure S4. Time series of flow rate (STP) of A2S2, sample pressure, and altitude (a.g.l.) during Flight #25.

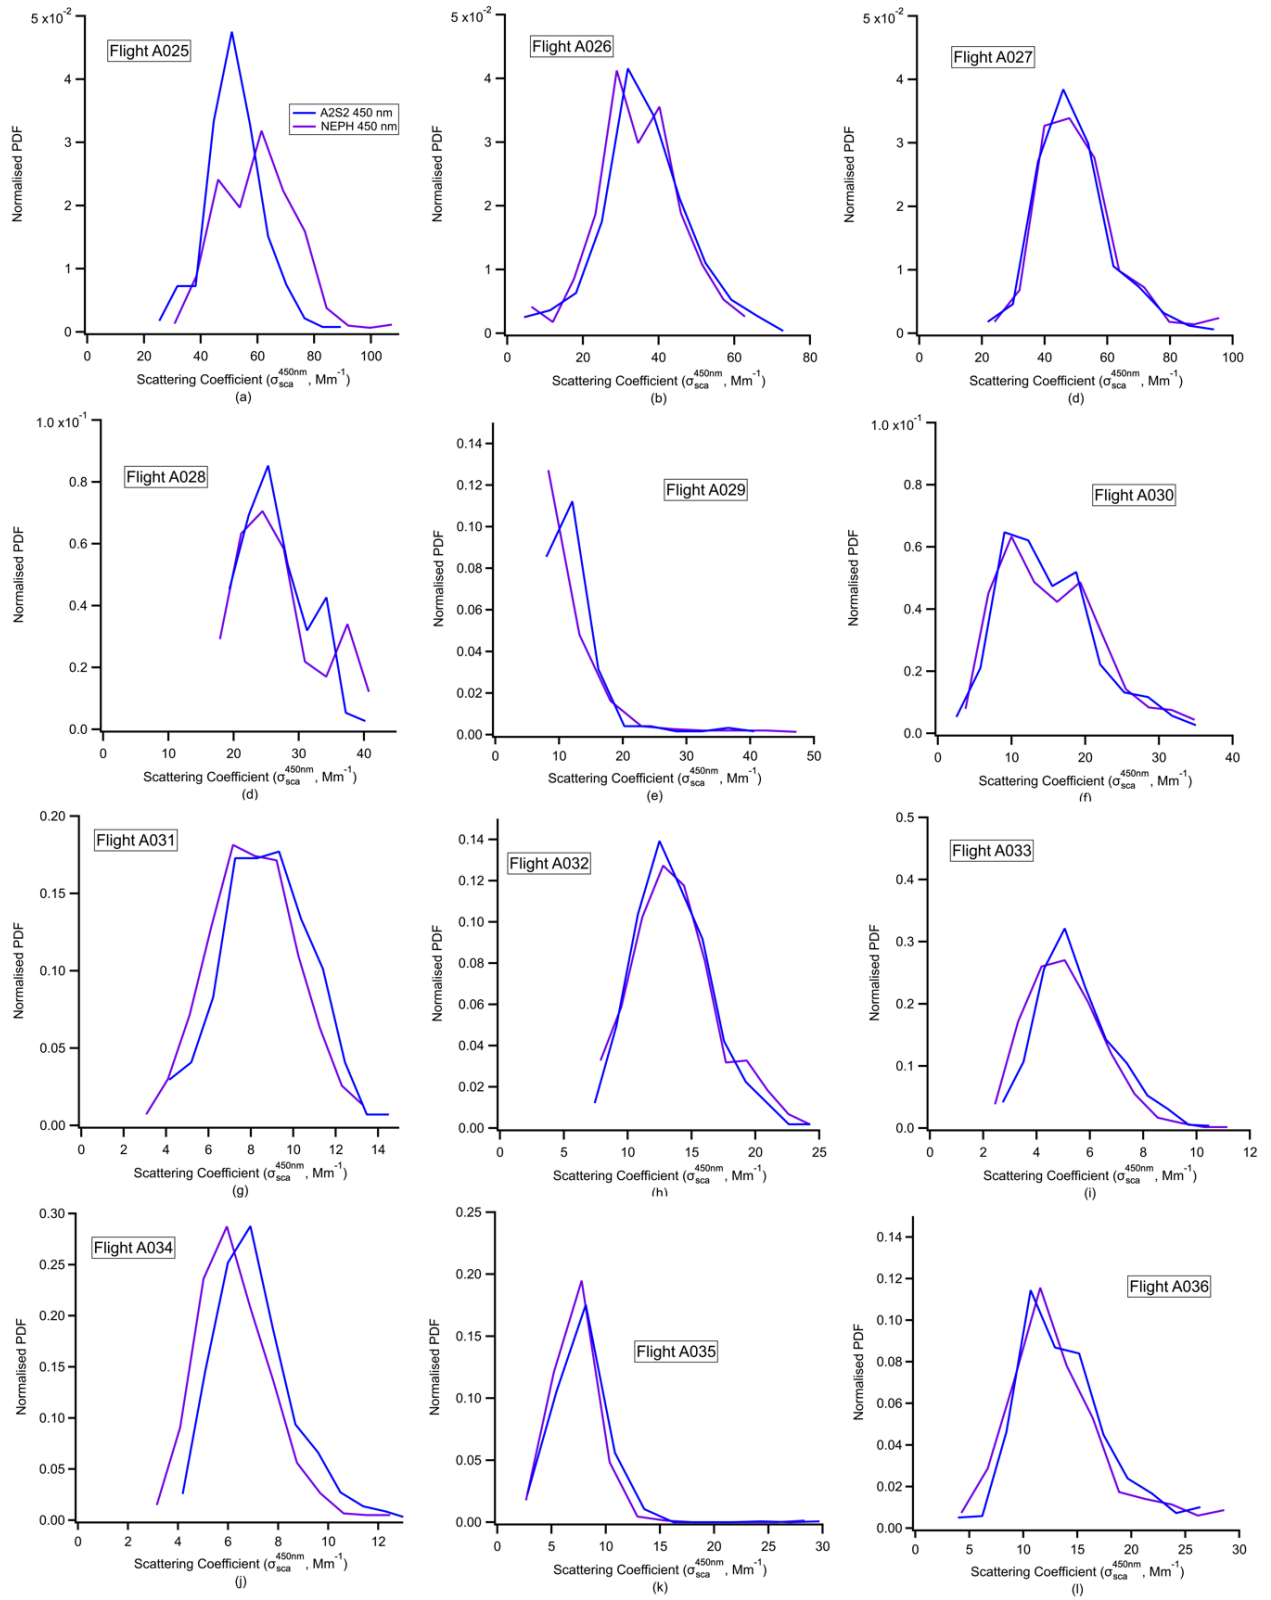

Figure S5 Normalised possibility distribution function (PDF) of A2S2 and NEPH at 450 nm

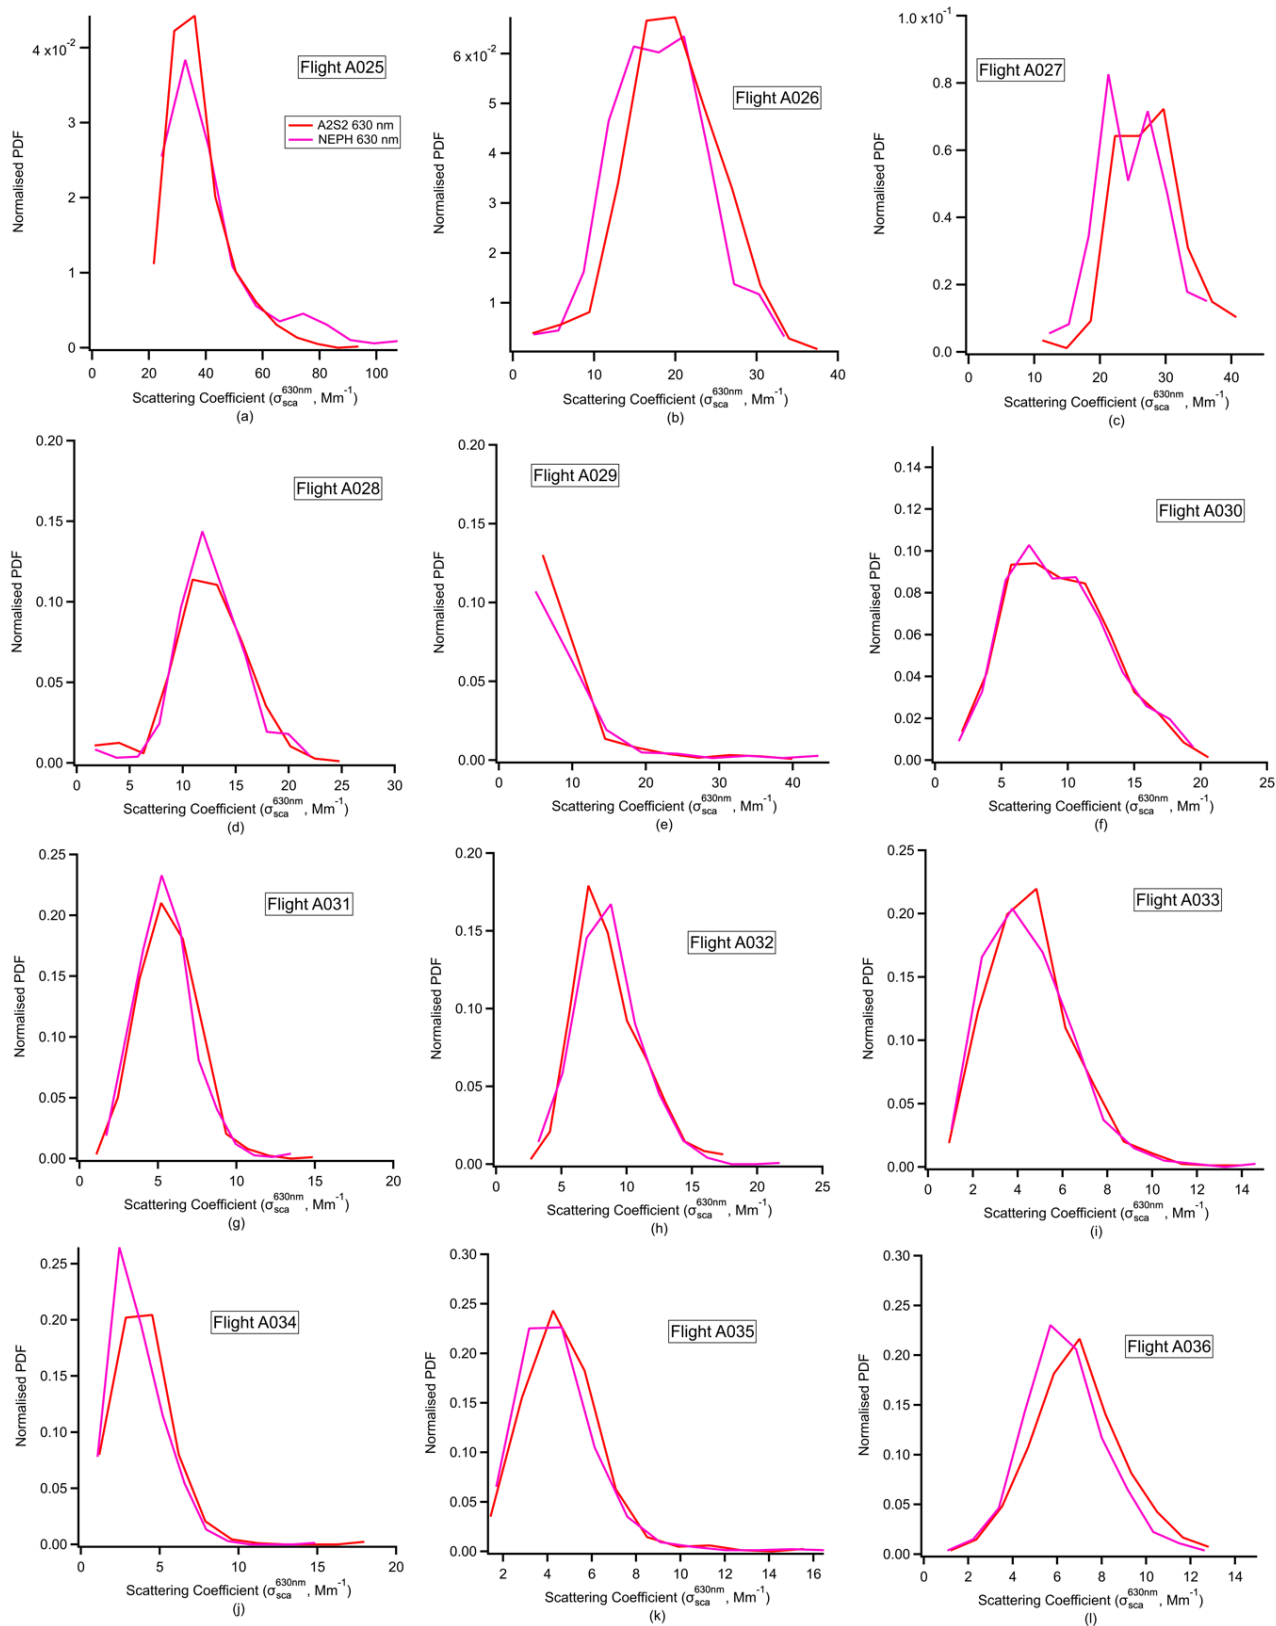

Figure S6 Normalised possibility distribution function (PDF) of A2S2 and NEPH at 630 nm
